# Supplementary material for: A Naked-Eye Visual Reverse Transcription Loop-Mediated Isothermal Amplification with Sharp Color Changes for Potential Pen-Side Test of Foot-and-Mouth Disease Virus
Source: MDPI journal article supplement (doi:10.3390/v14091982), 2022-09-07
Supplement: s1 [file s1]

**Table S1.** The information of the nucleic acid used in this study.

| No. | Nucleic Acid Type | Virus Type | Serotype |
|-----|-------------------|------------|----------|
| 1   | Genome RNA        | FMDV       | Asia 1   |
| 2   | Genome RNA        | FMDV       | SAT 2    |
| 3   | Genome RNA        | FMDV       | Unknown  |
| 4   | Genome RNA        | FMDV       | Unknown  |
| 5   | Genome RNA        | FMDV       | Unknown  |
| 6   | Genome RNA        | FMDV       | Unknown  |
| 7   | Genome RNA        | FMDV       | Unknown  |
| 8   | Genome RNA        | FMDV       | Unknown  |
| 9   | Genome RNA        | FMDV       | Unknown  |
| 10  | Genome RNA        | FMDV       | Unknown  |
| 11  | Genome RNA        | FMDV       | Unknown  |
| 12  | Genome RNA        | FMDV       | Unknown  |
| 13  | Genome RNA        | FMDV       | Unknown  |
| 14  | Genome RNA        | FMDV       | Unknown  |
| 15  | Genome RNA        | FMDV       | Unknown  |
| 16  | Genome RNA        | FMDV       | Unknown  |
| 17  | Genome RNA        | FMDV       | Unknown  |
| 18  | Genome RNA        | FMDV       | Unknown  |
| 19  | Genome RNA        | FMDV       | Unknown  |
| 20  | Genome RNA        | FMDV       | Unknown  |
| 21  | Genome RNA        | FMDV       | Unknown  |
| 22  | Genome RNA        | FMDV       | Unknown  |
| 23  | Genome RNA        | FMDV       | Unknown  |
| 24  | Genome RNA        | /          | /        |
| 25  | Genome RNA        | /          | /        |
| 26  | Genome RNA        | /          | /        |
| 27  | Genome RNA        | /          | /        |
| 28  | Genome RNA        | /          | /        |
| 29  | Genome RNA        | /          | /        |
| 30  | Genome RNA        | /          | /        |
| 31  | Genome RNA        | /          | /        |
| 32  | Genome RNA        | /          | /        |
| 33  | Genome RNA        | /          | /        |
| 34  | Genome RNA        | /          | /        |
| 35  | Genome RNA        | /          | /        |
| 36  | Genome RNA        | /          | /        |
| 37  | Genome RNA        | /          | /        |
| 38  | Genome RNA        | /          | /        |
| 39  | Genome RNA        | /          | /        |
| 40  | Genome RNA        | /          | /        |
| 41  | Genome RNA        | /          | /        |
| 42  | Genome RNA        | /          | /        |
| 43  | Genome RNA        | /          | /        |
| 44  | Genome RNA        | /          | /        |
| 45  | Genome RNA        | /          | /        |
| 46  | Genome RNA        | /          | /        |
| 47  | Genome RNA        | /          | /        |
| 48  | Genome RNA        | /          | /        |

|    |                    |      |        |
|----|--------------------|------|--------|
| 49 | Genome RNA         | /    | /      |
| 50 | Genome RNA         | /    | /      |
| 51 | Genome RNA         | /    | /      |
| 52 | Genome RNA         | /    | /      |
| 53 | Genome RNA         | /    | /      |
| 54 | Genome RNA         | /    | /      |
| 55 | Genome RNA         | /    | /      |
| 56 | Genome RNA         | /    | /      |
| 57 | Genome RNA         | /    | /      |
| 58 | Genome RNA         | /    | /      |
| 59 | Genome RNA         | /    | /      |
| 60 | 3D RNA Transcripts | FMDV | A      |
| 61 | 3D RNA Transcripts | FMDV | A      |
| 62 | 3D RNA Transcripts | FMDV | A      |
| 63 | 3D RNA Transcripts | FMDV | A      |
| 64 | 3D RNA Transcripts | FMDV | A      |
| 65 | 3D RNA Transcripts | FMDV | A      |
| 66 | 3D RNA Transcripts | FMDV | O      |
| 67 | 3D RNA Transcripts | FMDV | O      |
| 68 | 3D RNA Transcripts | FMDV | O      |
| 69 | 3D RNA Transcripts | FMDV | O      |
| 70 | 3D RNA Transcripts | FMDV | O      |
| 71 | 3D RNA Transcripts | FMDV | O      |
| 72 | 3D RNA Transcripts | FMDV | O      |
| 73 | 3D RNA Transcripts | FMDV | O      |
| 74 | 3D RNA Transcripts | FMDV | Asia 1 |
| 75 | 3D RNA Transcripts | FMDV | Asia 1 |
| 76 | 3D RNA Transcripts | FMDV | Asia 1 |
| 77 | 3D RNA Transcripts | FMDV | Asia 1 |
| 78 | 3D RNA Transcripts | FMDV | C      |
| 79 | 3D RNA Transcripts | FMDV | C      |
| 80 | 3D RNA Transcripts | FMDV | C      |
| 81 | 3D RNA Transcripts | FMDV | C      |
| 82 | 3D RNA Transcripts | FMDV | SAT 1  |
| 83 | 3D RNA Transcripts | FMDV | SAT 1  |
| 84 | 3D RNA Transcripts | FMDV | SAT 1  |
| 85 | 3D RNA Transcripts | FMDV | SAT 1  |
| 86 | 3D RNA Transcripts | FMDV | SAT 1  |
| 87 | 3D RNA Transcripts | FMDV | SAT 2  |
| 88 | 3D RNA Transcripts | FMDV | SAT 2  |
| 89 | 3D RNA Transcripts | FMDV | SAT 2  |
| 90 | 3D RNA Transcripts | FMDV | SAT 2  |
| 91 | 3D RNA Transcripts | FMDV | SAT 2  |
| 92 | 3D RNA Transcripts | FMDV | SAT 2  |
| 93 | 3D RNA Transcripts | FMDV | SAT 3  |
| 94 | 3D RNA Transcripts | FMDV | SAT 3  |
| 95 | 3D RNA Transcripts | FMDV | SAT 3  |
| 96 | 3D RNA Transcripts | FMDV | SAT 3  |
| 97 | 3D RNA Transcripts | FMDV | SAT 3  |
| 98 | 3D RNA Transcripts | FMDV | SAT 3  |
| 99 | Genome DNA         | ORFV | /      |

|     |            |          |   |
|-----|------------|----------|---|
| 100 | Genome DNA | SPPV     | / |
| 101 | Genome RNA | BVDV     | / |
| 102 | Genome RNA | BTV      | / |
| 103 | Genome RNA | CSFV     | / |
| 104 | Genome RNA | SVV      | / |
| 105 | Genome RNA | HP-PRRSV | / |
| 106 | Genome DNA | PCV3     | / |
| 107 | Genome DNA | PPV      | / |
| 108 | Genome DNA | PRV      | / |

**Table S2.** The amplification program for identification of ORFV, SPPV/GTPV, PRV, PCV3 and PPV.

| Steps | ORFV      | SPPV/GTPV | PRV        | PCV3      | PPV       |
|-------|-----------|-----------|------------|-----------|-----------|
| 1     |           |           | 95°C, 5min |           |           |
| 2     |           |           | 95°C, 30s  |           |           |
| 3     | 55°C, 30s | 54°C, 30s | 57°C, 30s  | 54°C, 30s | 50°C, 30s |
| 4     | 72°C, 90s | 72°C, 40s | 72°C, 30s  | 72°C, 30s | 72°C, 40s |
| 5     |           |           | 72°C, 5min |           |           |

36 Cycles were repeated from step 2 to 4.

**Table S3.** The amplification program for identification of BVDV, SVV, CSFV, BTV and PRRSV.

| Steps | BVDV      | CSFV      | SVV         | BTV       | PRRSV     |
|-------|-----------|-----------|-------------|-----------|-----------|
| 1     |           |           | 50°C, 30min |           |           |
| 2     |           |           | 95°C, 5min  |           |           |
| 3     |           |           | 95°C, 30s   |           |           |
| 4     | 55°C, 30s | 58°C, 30s | 55°C, 30s   | 58°C, 30s | 58°C, 30s |
| 5     | 72°C, 30s | 72°C, 20s | 72°C, 50s   | 72°C, 90s | 72°C, 90s |
| 6     |           |           | 72°C, 5min  |           |           |

36 Cycles were repeated from step 3 to 5.

**Table S4.** The information of the primers used for virus self-identification.

| Primer              | Sequences                           | Product size (bp) |
|---------------------|-------------------------------------|-------------------|
| ORFV-F              | 5'-AAAGGATCCATGTGGCCGTTCTCCTCCAT-3' | 1137              |
| ORFV-R              | 5'-AAACTCGAGTTAATTTATTGGCTTGCAGA-3' |                   |
| SPPV/GTPV-F         | 5'-GCCTCGAGATGGATGATGAT-3'          | 600               |
| SPPV/GTPV-R         | 5'-GCGGATCCACTTTTTTCTACAGCTCT-3'    |                   |
| PRV-F               | 5'-GCGTGTACTGCGACTGCGTGTT-3'        | 356               |
| PRV-R               | 5'-CGACCTGGCGTTTATTAACCGAGA-3'      |                   |
| PCV <sub>3</sub> -F | 5'-ACGGTGGGGTCATATGTGTT-3'          | 250               |
| PCV <sub>3</sub> -R | 5'-CGCCTGGACCACAAACAC-3'            |                   |
| PPV-F               | 5'-GAATAGGATGCGAGGAAAG-3'           | 445               |
| PPV-R               | 5'-GTGGAAATCTGAGAGTCTGT-3'          |                   |
| BVDV-F              | 5'-CTAGCCATGCCCTTAGTAGGACTA-3'      | 300               |
| BVDV-R              | 5'-CAACTCCATGTGCCATGTACAGCA-3'      |                   |
| CSFV-F              | 5'-ATTTGGTTCAGGGCCTCC-3'            | 424               |
| CSFV-R              | 5'-CTCCGAACAATGGTCTCCC-3'           |                   |
| SVV-F               | 5'-AGGCGGGTAACACTGACACCGA-3'        | 800               |
| SVV-R               | 5'-TGTCAGAAGCAGGACCAGGATTG-3'       |                   |
| BTV-F               | 5'-GTAAAAAATCTATAGATGG-3'           | 1200              |
| BTV-R               | 5'-GTAAGTGTAATCTAAGAG-3'            |                   |
| PRRSV-F             | 5'-GCTCCGCGCAGGAAGGTCA-3'           | 335/245           |
| PRRSV-R             | 5'-GTGCGTCAGCGTTGTTGTC-3'           |                   |

**Table S5.** Test results of 59 clinical samples.

| No. | Visual RT-LAMP | RT-qPCR | RT-PCR |
|-----|----------------|---------|--------|
| 1   | +              | +       | +      |
| 2   | +              | +       | +      |
| 3   | +              | +       | +      |
| 4   | +              | +       | +      |
| 5   | +              | +       | +      |
| 6   | +              | +       | +      |
| 7   | +              | +       | +      |
| 8   | +              | +       | +      |
| 9   | –              | +       | –      |
| 10  | +              | +       | +      |
| 11  | +              | +       | +      |
| 12  | +              | +       | +      |
| 13  | +              | +       | +      |
| 14  | +              | +       | +      |
| 15  | +              | +       | +      |
| 16  | +              | +       | +      |
| 17  | +              | +       | +      |
| 18  | +              | +       | +      |
| 19  | +              | +       | +      |
| 20  | +              | +       | +      |
| 21  | +              | +       | +      |
| 22  | +              | +       | +      |
| 23  | +              | +       | +      |
| 24  | –              | –       | –      |
| 25  | –              | –       | –      |
| 26  | –              | –       | –      |
| 27  | –              | –       | –      |
| 28  | –              | –       | –      |
| 29  | –              | –       | –      |
| 30  | –              | –       | –      |
| 31  | –              | –       | –      |
| 32  | –              | –       | –      |
| 33  | –              | –       | –      |
| 34  | –              | –       | –      |
| 35  | –              | –       | –      |
| 36  | –              | –       | –      |
| 37  | –              | –       | –      |
| 38  | –              | –       | –      |
| 39  | –              | –       | –      |
| 40  | –              | –       | –      |
| 41  | –              | –       | –      |
| 42  | –              | –       | –      |
| 43  | –              | –       | –      |
| 44  | –              | –       | –      |
| 45  | –              | –       | –      |
| 46  | –              | –       | –      |
| 47  | –              | –       | –      |
| 48  | –              | –       | –      |

|    |   |   |   |
|----|---|---|---|
| 49 | – | – | – |
| 50 | – | – | – |
| 51 | – | – | – |
| 52 | – | – | – |
| 53 | – | – | – |
| 54 | – | – | – |
| 55 | – | – | – |
| 56 | – | – | – |
| 57 | – | – | – |
| 58 | – | – | – |
| 59 | – | – | – |

Positive samples were marked “+” and negative samples were marked “–”.
